# Supplementary material for: The markers of the organic acidemias and their ratios in healthy neonates in Serbian population
Source: publisher site journal article supplement (doi:10.1515/dmpt-2021-0218), 2022-03-07
Supplement: Supplementary file 1 [file j_dmpt-2021-0218_suppl.docx]

| a | 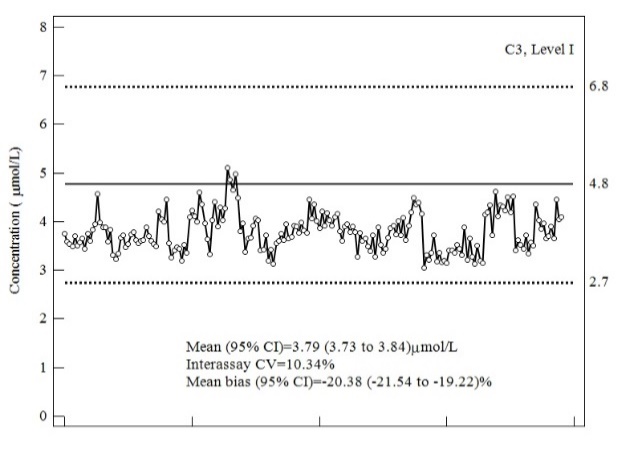 | b | 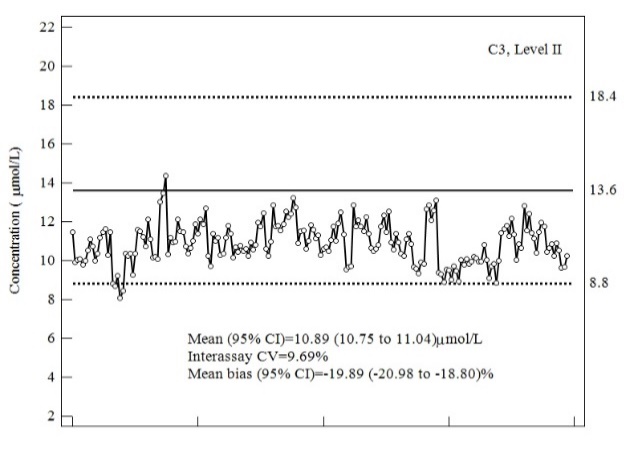 |
| --- | --- | --- | --- |
| c | 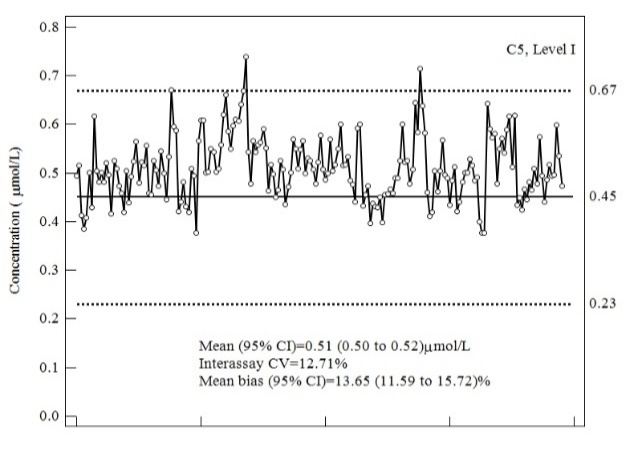 | d | 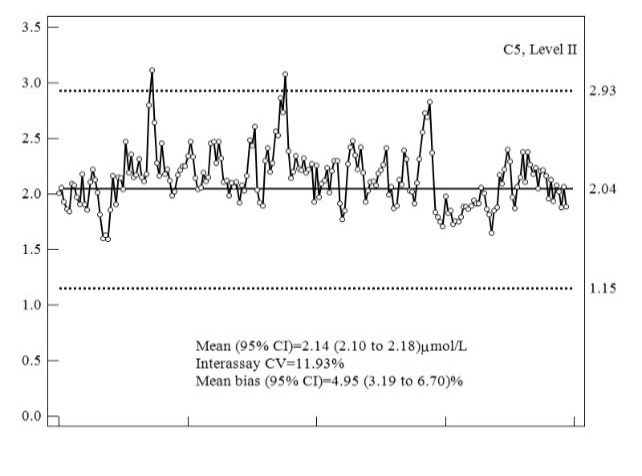 |
| e | 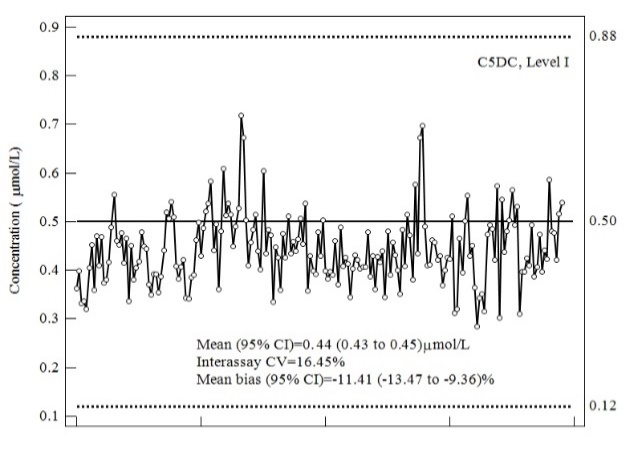 | f | 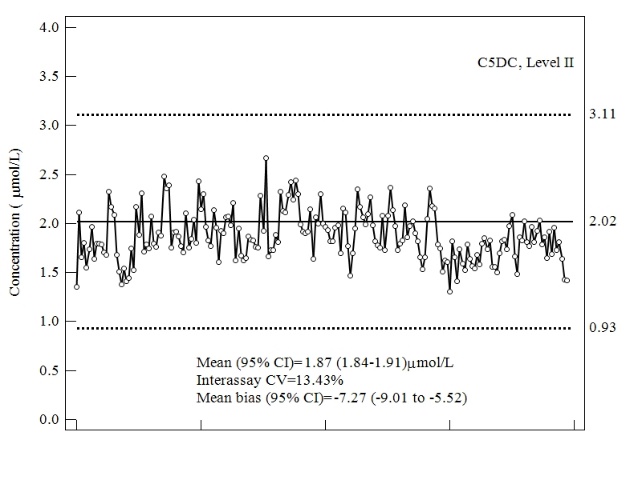 |
| Supplementary Figure: QC charts with the mean of measured values (represented by circles) with the 95% confidence interval (CI), coefficient of variation (CV), and mean bias with the 95% (CI) for: (a, b) propionylcarnitine (C3), (c, d) isovalerylcarnitine (C5), and (e, f) glutarylcarnitine (C5DC). On the right of the y-axis there are the target value (line) and the acceptable range of values (dotted line), as declared by the Manufacturer. | | | |
